# Supplementary material
Source: PubMed Central journal article supplement (PMC7091392)
Supplement: jamainternmed-e200090-s001.pdf [file jamainternmed-e200090-s001.pdf]

## Supplementary Online Content

Gill J, Haslam A, Crain T, Herrera-Perez D, Prasad V. Comparison of industry payments in 2017 with annual salary in a cohort of academic oncologists. *JAMA Internal Med.* Published March 23, 2020. doi:10.1001/jamainternmed.2020.0090

**eFigure.** Flow chart indicating how the number of medical schools and number of faculty members included in final dataset was derived.

This supplementary material has been provided by the authors to give readers additional information about their work.

**eFigure. Flow chart indicating how the number of medical schools and number of faculty members included in final dataset was derived.** Exclusion criteria were: faculty with no salary reported or salary less than \$100,000 in the state’s 2017 public database; and medical schools with fewer than 10 faculty members with reported salaries. The final dataset included 14 medical schools and 630 faculty members.

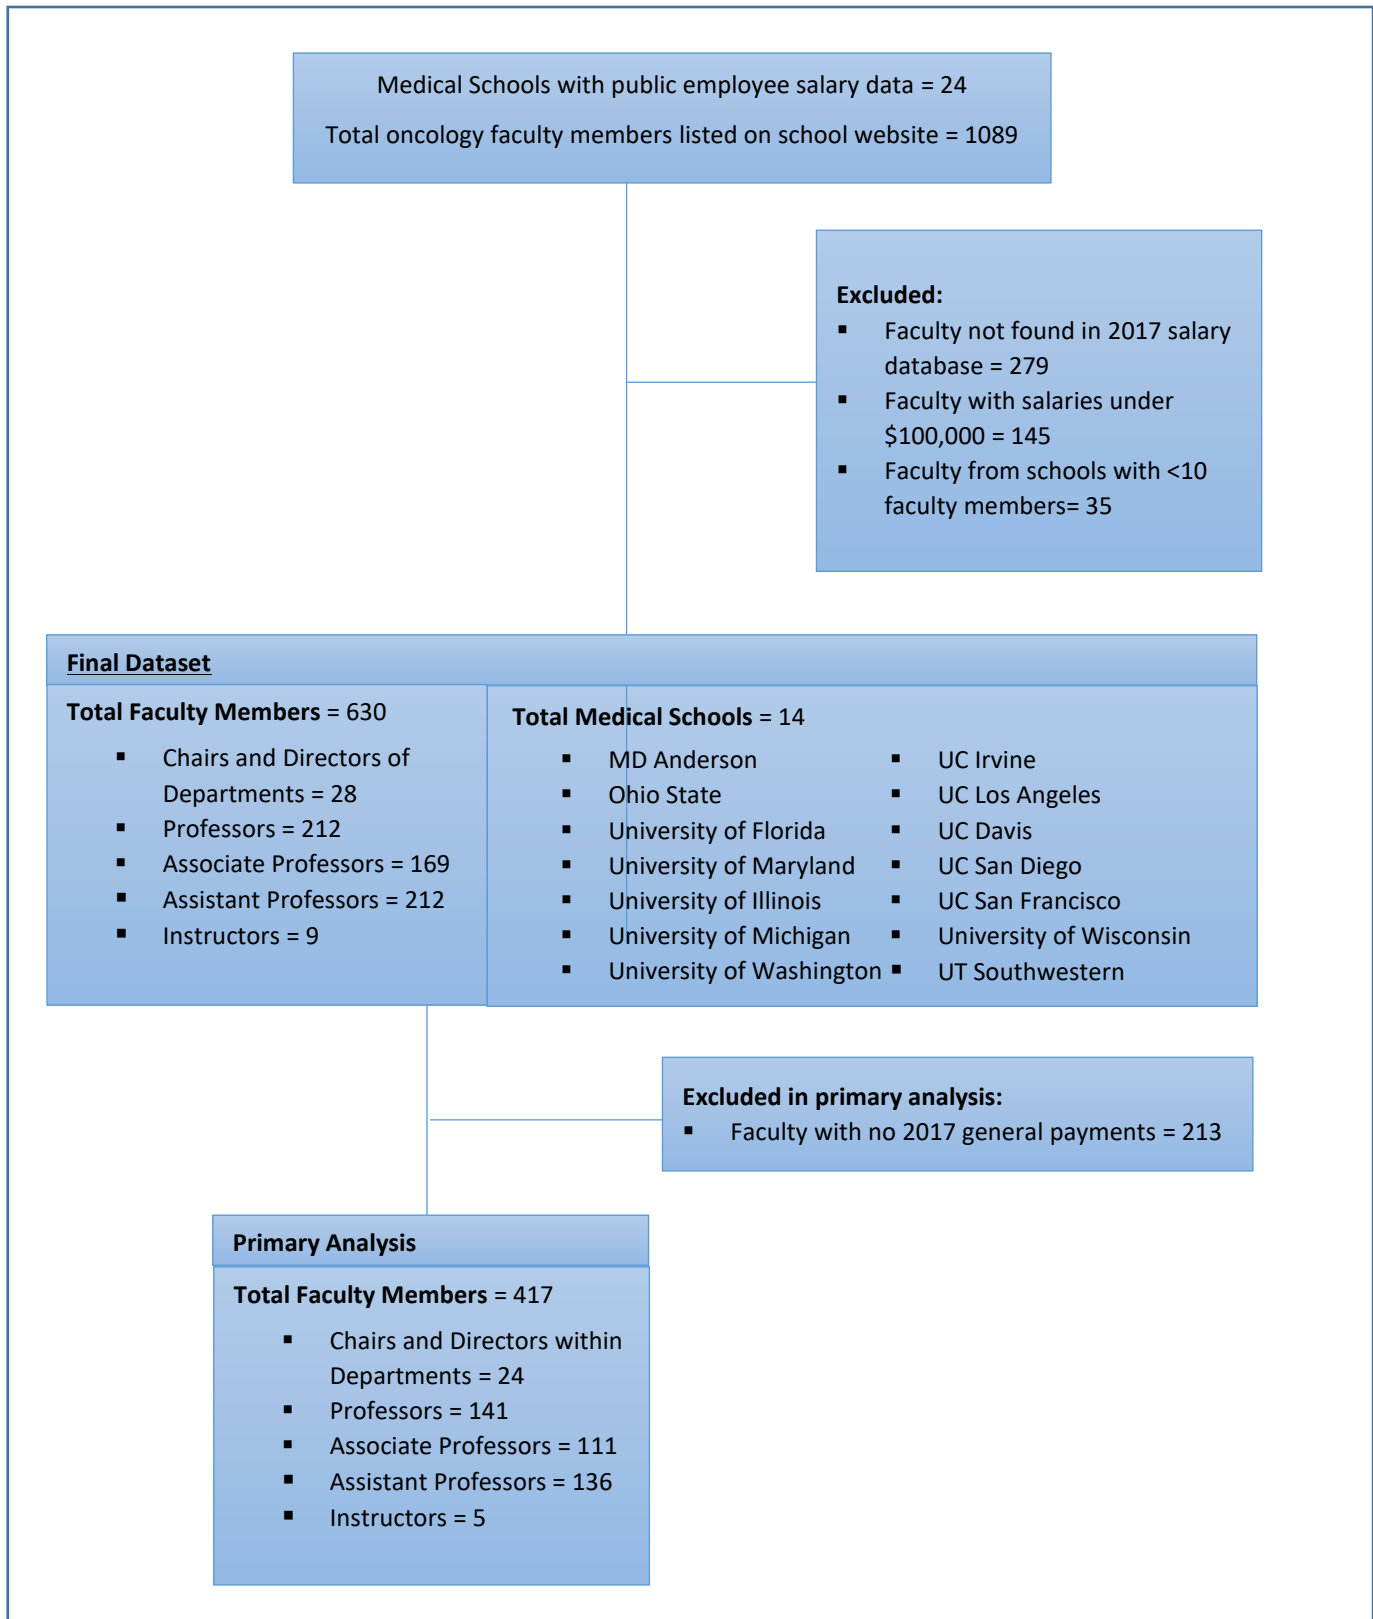

Abbreviations: UC, University of California; UT, University of Texas;
